# Supplementary material for: Cultural Adaptation and Psychometric Evaluation of the Preference for Intuition and Deliberation in Eating Decision-making Scale among Chinese People with Cardiovascular Disease
Source: Research Square preprint supplement (doi:10.21203/rs.3.rs-7199291/v1), 2025-09-09
Supplement: Supplementary file 1 [file 26583428d156f2ef32ec3447.docx]

|  | **Item1** | **Item2** | **Item3** | **Item4** | **Item5** | **Item6** | **Item7** | **Mean of item1-3** | **Mean of item 4-7** |
| --- | --- | --- | --- | --- | --- | --- | --- | --- | --- |
| M | 3.72 | 3.31 | 3.07 | 3.31 | 2.06 | 2.69 | 3.81 | 3.36 | 2.97 |
| SD | 0.89 | 0.96 | 1.06 | 0.60 | 0.62 | 0.64 | 0.77 | 0.84 | 0.50 |
| Skewness | -0.75 | -0.05 | 0.06 | 0.04 | 1.02 | 0.32 | -0.66 | -0.37 | 0.05 |
| Kurtosis | 0.63 | -0.34 | -0.61 | 1.29 | 3.13 | 0.89 | 1.14 | -0.36 | 1.02 |
| Score1 (%) | 2.1 | 2.7 | 6.1 | 0.8 | 12.6 | 1.20 | 1.1 |  |  |
| Score2 (%) | 7.1 | 15.7 | 24.5 | 2.8 | 72.3 | 35.70 | 3.1 |  |  |
| Score3 (%) | 23.7 | 41.1 | 35.8 | 62.7 | 11.8 | 56.90 | 24.7 |  |  |
| Score4 (%) | 51.5 | 29 | 23.4 | 31.9 | 2.9 | 5.10 | 55.6 |  |  |
| Score5 (%) | 16 | 11.4 | 10.1 | 1.8 | 0.3 | 1.00 | 15.4 |  |  |

**Table S1.** Response frequency of each item in the Chinese version of the E-PID (*n* = 1463)

*Notes:* SD: Standard deviation.
