# Supplementary figures and images for: Cultural Adaptation and Psychometric Evaluation of the Preference for Intuition and Deliberation in Eating Decision-making Scale among Chinese People with Cardiovascular Disease
Source: Research Square preprint supplement (doi:10.21203/rs.3.rs-7199291/v1), 2025-09-09

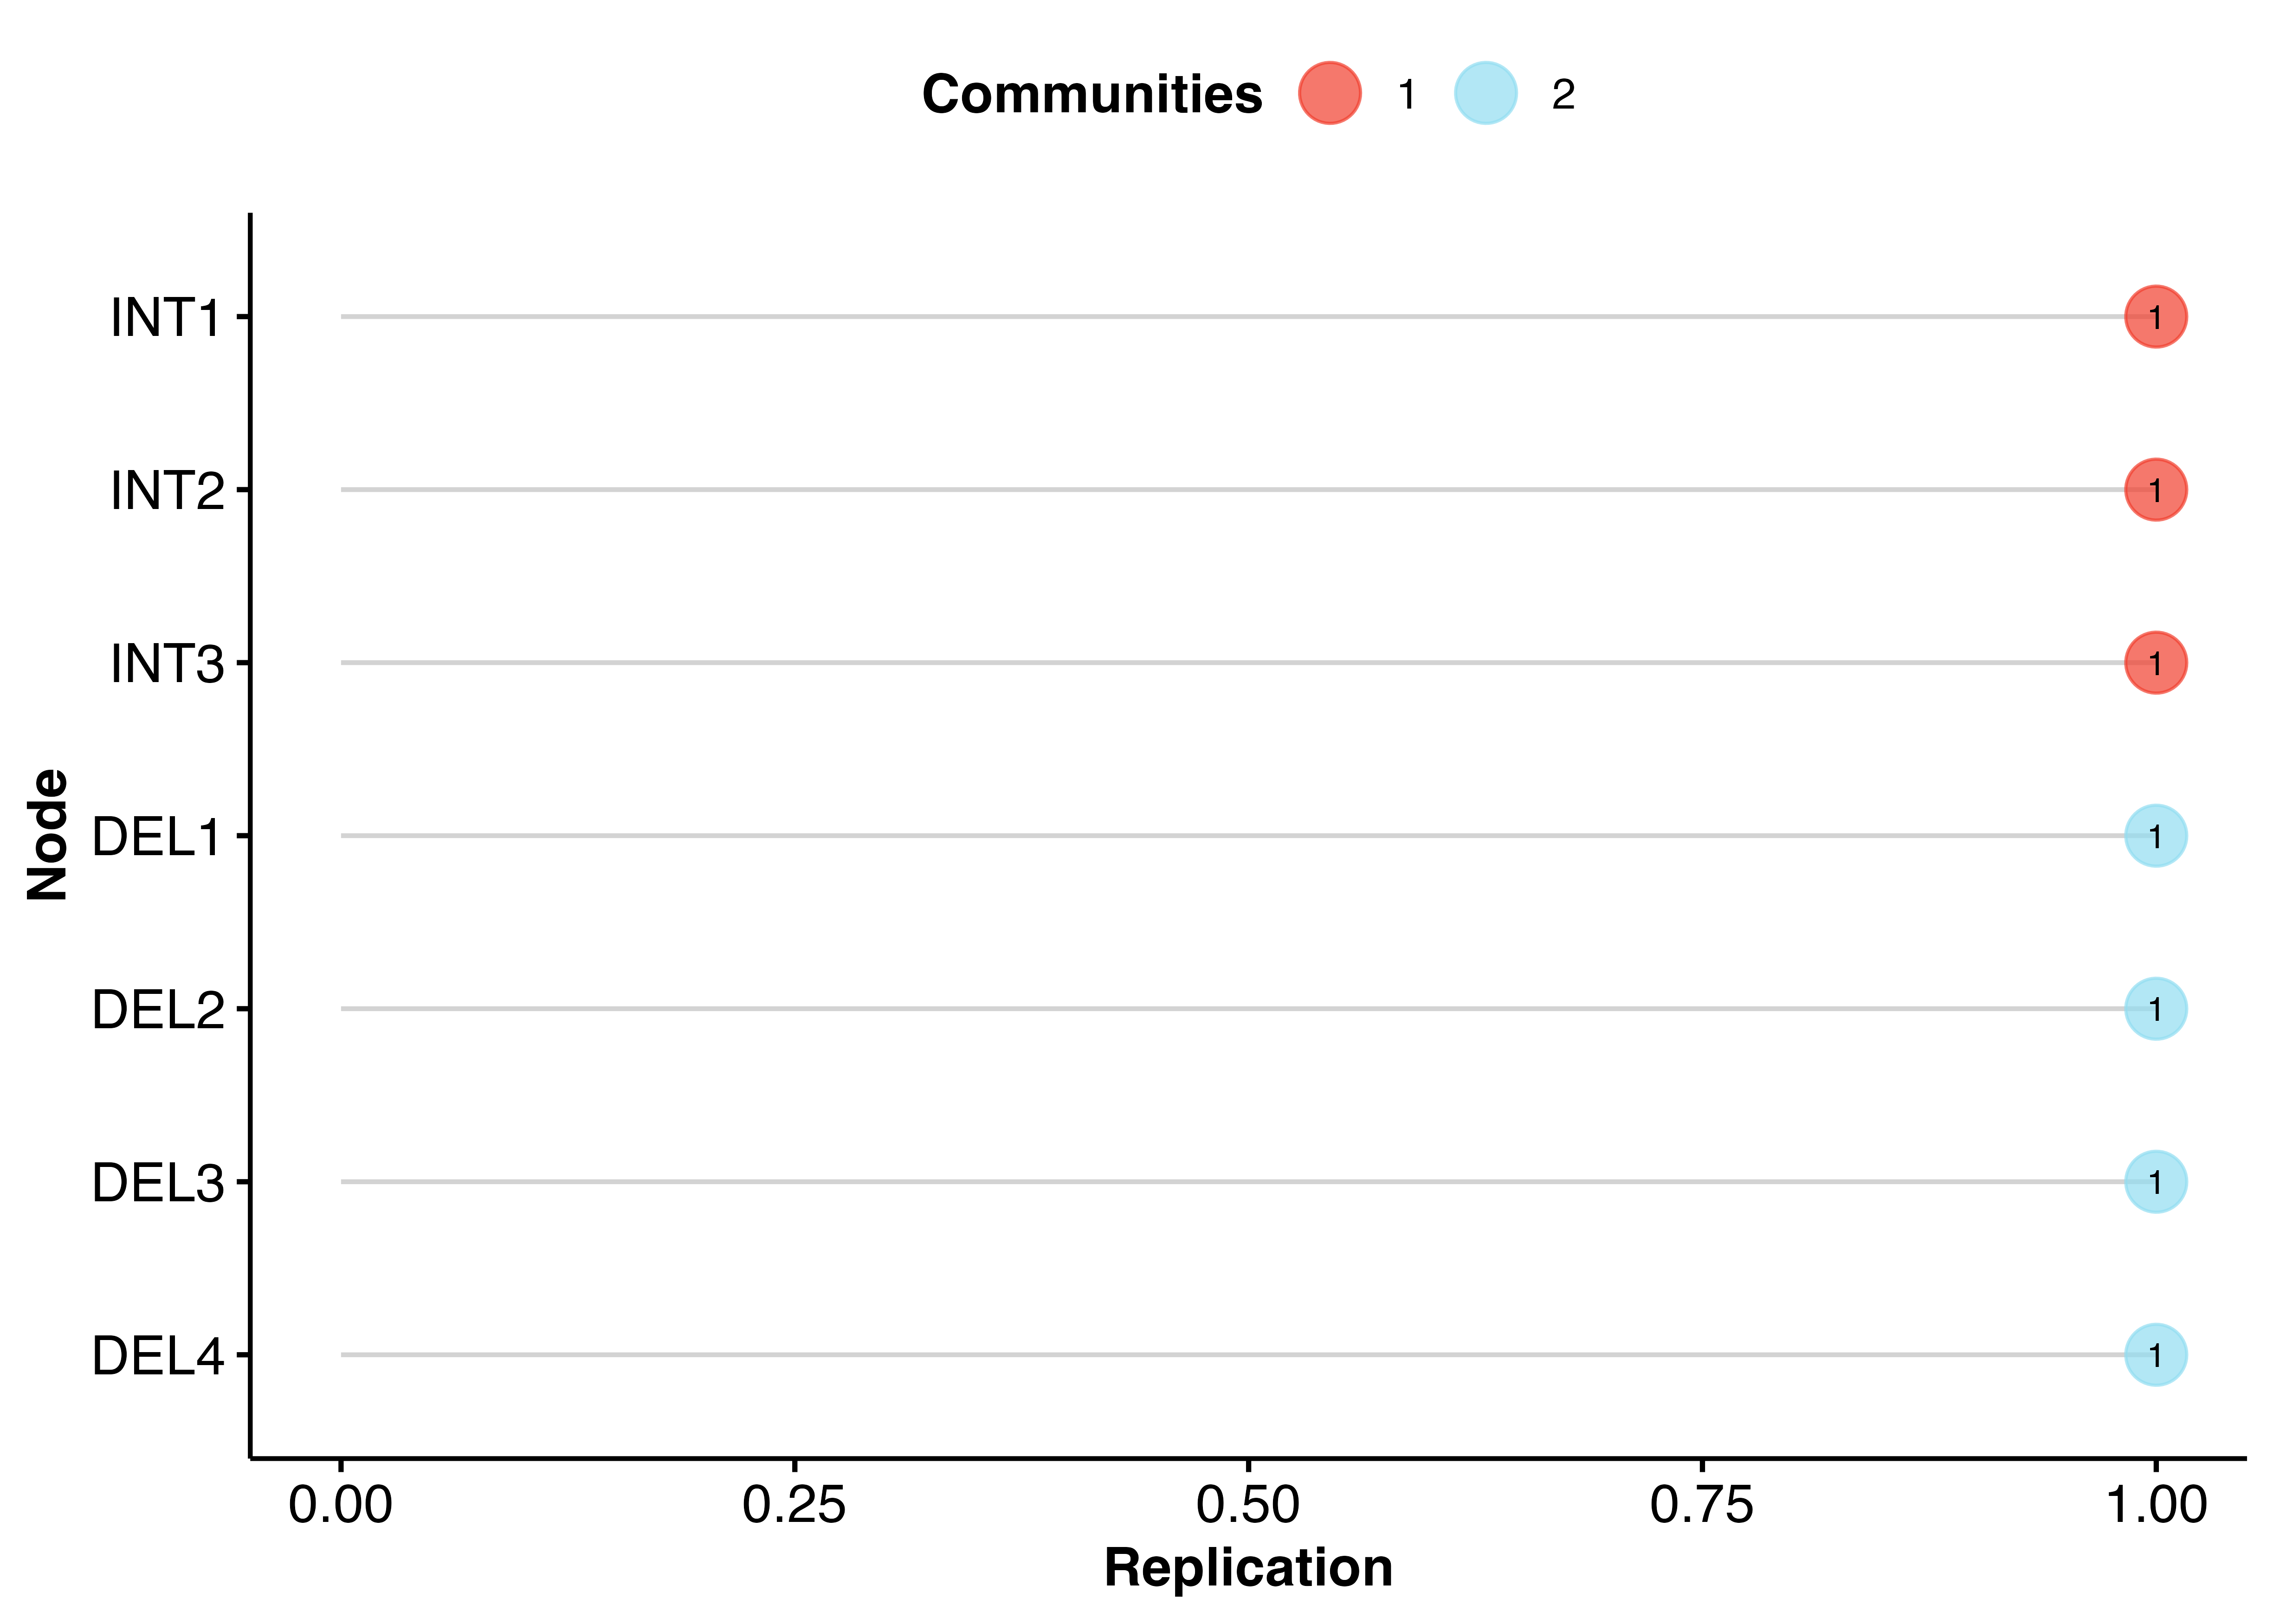


Figure S 1 Item Replication of the EGA structure

Supplement: Supplementary file 2 [file 895217532012ae52e98c6469.docx]
